# Supplementary material for: Structure, magnetic and optical properties of Sr3RE2(Ge3O9)2 cyclogermanates (RE = La–Gd)
Source: Royal Society of Chemistry journal article supplement (doi:10.1039/c8ce00005k), 2018-01-01
Supplement: c8ce00005k1.pdf [file c8ce00005k1.pdf]

## Structure, magnetic and optical properties of $\text{Sr}_3\text{RE}_2(\text{Ge}_3\text{O}_9)_2$ cyclogermanates ( $\text{RE} = \text{La} - \text{Gd}$ )

Alexander Yu. Chufarov, Olga A. Lipina\*, Ludmila L. Surat,

Marina A. Melkozerova, Yana V. Baklanova, , Andrey N. Enyashin,

Alexander P. Tyutyunnik, Dina G. Kellerman and Vladimir G. Zubkov

Institute of Solid State Chemistry, UB RAS, 620990 Ekaterinburg, Russia

\* Corresponding author. E-Mail: LipinaOlgaA@yandex.ru

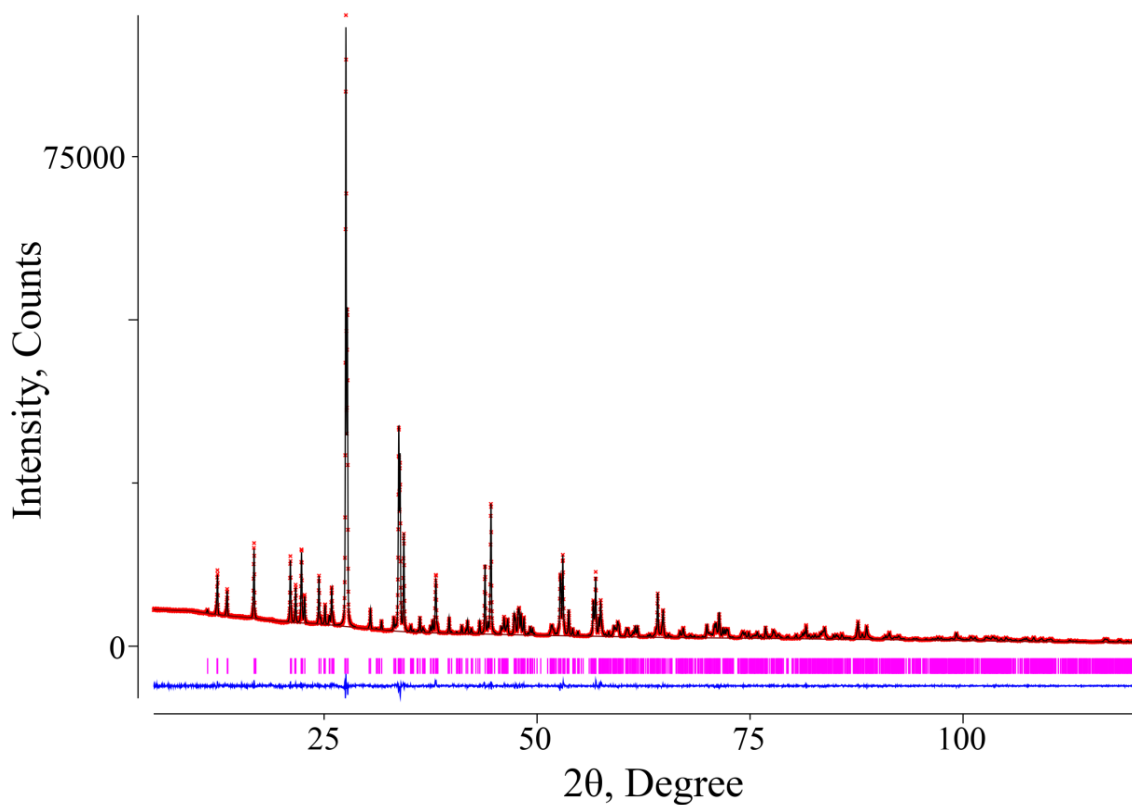

**Fig. S1** Experimental (crosses), calculated (solid line), and difference (bottom line) XRPD patterns for  $\text{Sr}_3\text{La}_2(\text{Ge}_3\text{O}_9)_2$ . Series of tick marks correspond to the Bragg reflection.

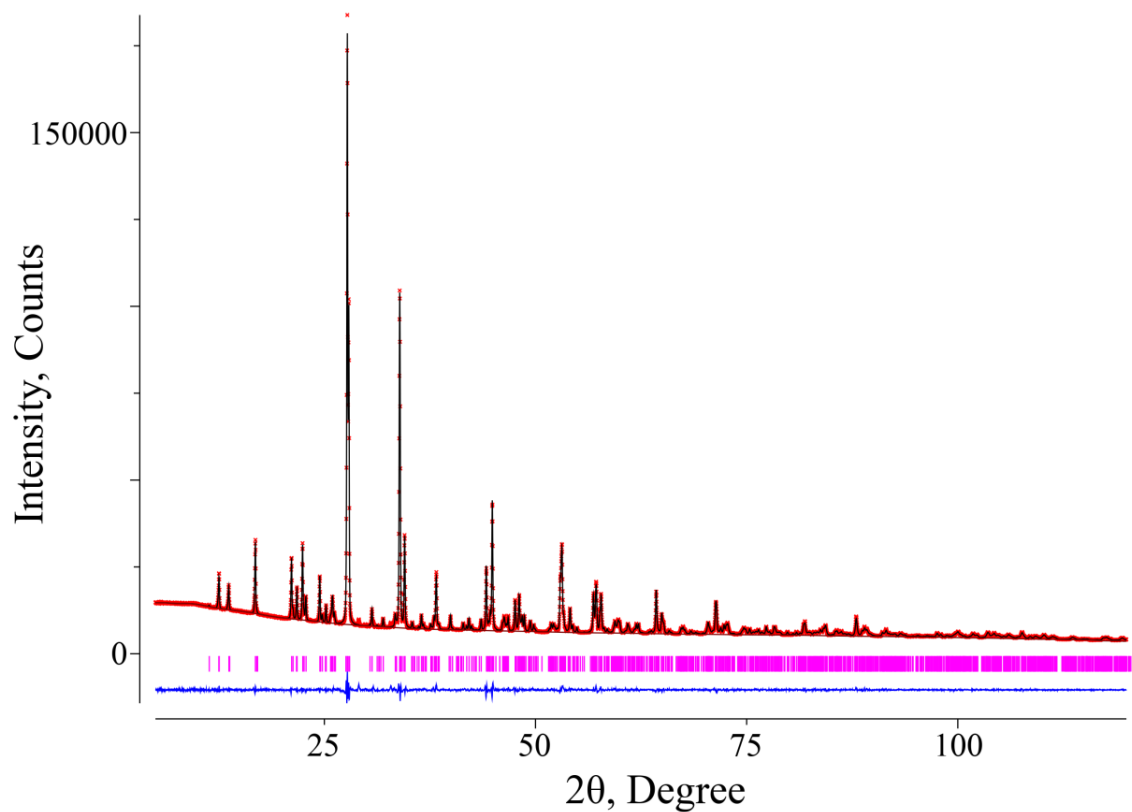

**Fig. S2** Experimental (crosses), calculated (solid line), and difference (bottom line) XRPD patterns for  $\text{Sr}_3\text{Pr}_2(\text{Ge}_3\text{O}_9)_2$ . Series of tick marks correspond to the Bragg reflection.

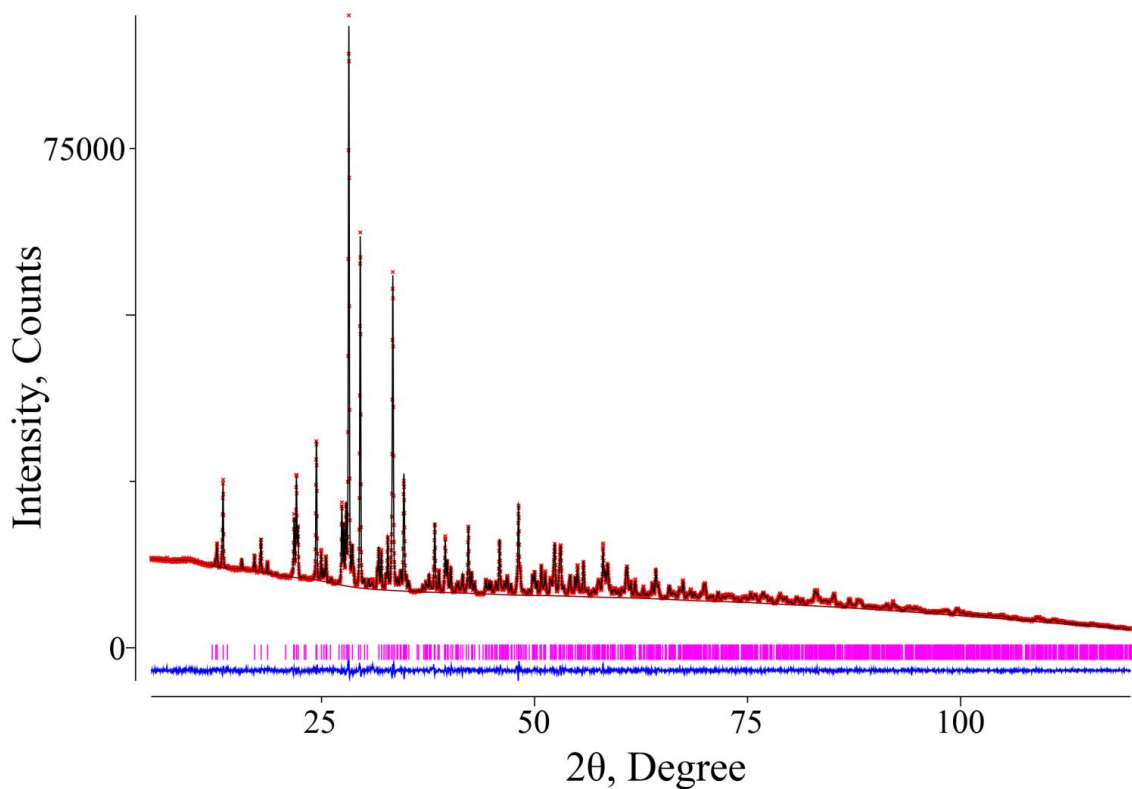

**Fig. S3** Experimental (crosses), calculated (solid line), and difference (bottom line) XRPD patterns for  $\text{Sr}_3\text{Sm}_2(\text{Ge}_3\text{O}_9)_2$ . Series of tick marks correspond to the Bragg reflection.

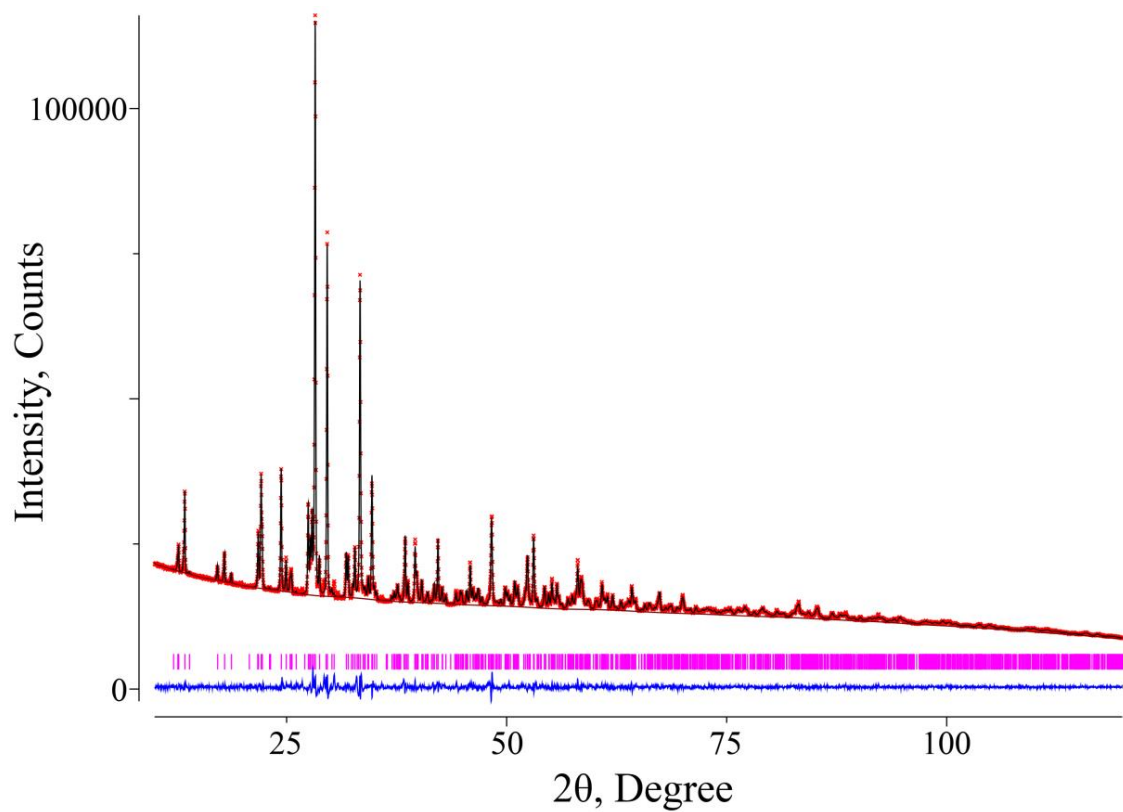

**Fig. S4** Experimental (crosses), calculated (solid line), and difference (bottom line) XRPD patterns for  $\text{Sr}_3\text{Eu}_2(\text{Ge}_3\text{O}_9)_2$ . Series of tick marks correspond to the Bragg reflection.

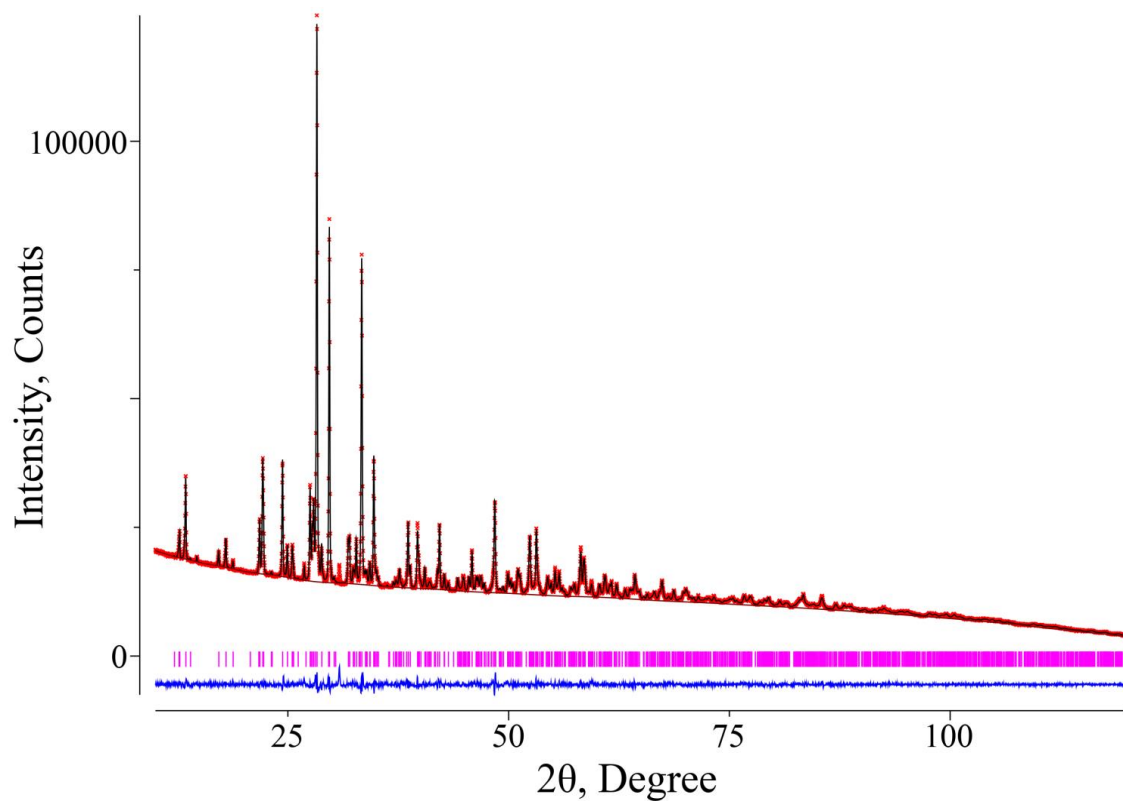

**Fig. S5** Experimental (crosses), calculated (solid line), and difference (bottom line) XRPD patterns for  $\text{Sr}_3\text{Gd}_2(\text{Ge}_3\text{O}_9)_2$ . Series of tick marks correspond to the Bragg reflection.

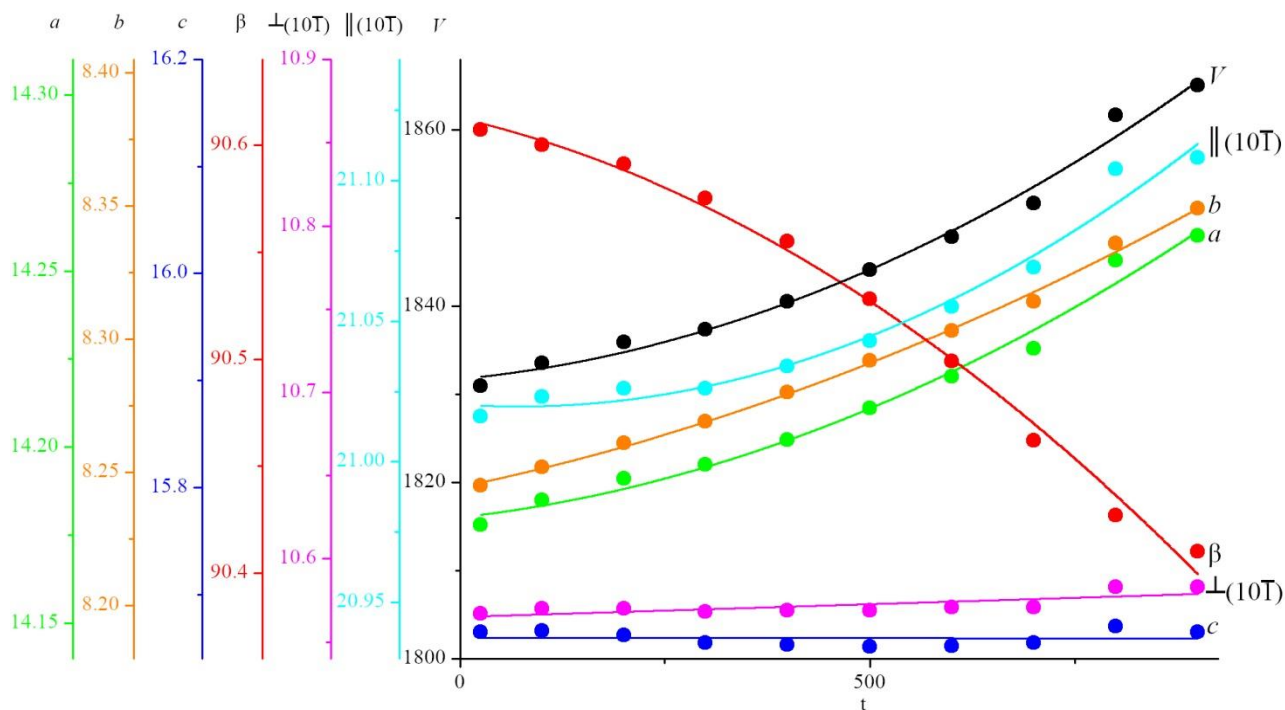

**Fig. S6** Temperature dependence of the unit cell parameters and distances along the normal ( $\perp$ ) and parallel ( $\parallel$ ) to  $(10\bar{1})$  plane for  $\text{Sr}_3\text{La}_2(\text{Ge}_3\text{O}_9)_2$ .

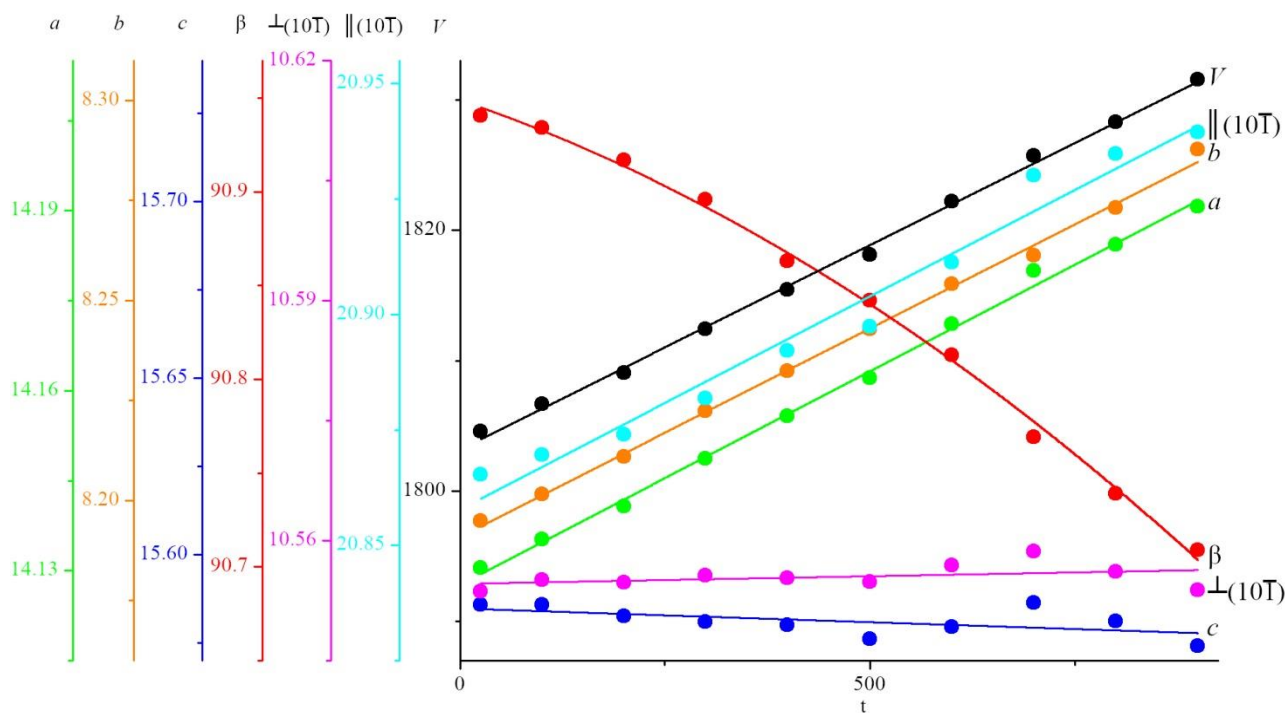

**Fig. S7** Temperature dependence of the unit cell parameters and distances along the normal ( $\perp$ ) and parallel ( $\parallel$ ) to  $(10\bar{1})$  plane for  $\text{Sr}_3\text{Pr}_2(\text{Ge}_3\text{O}_9)_2$ .

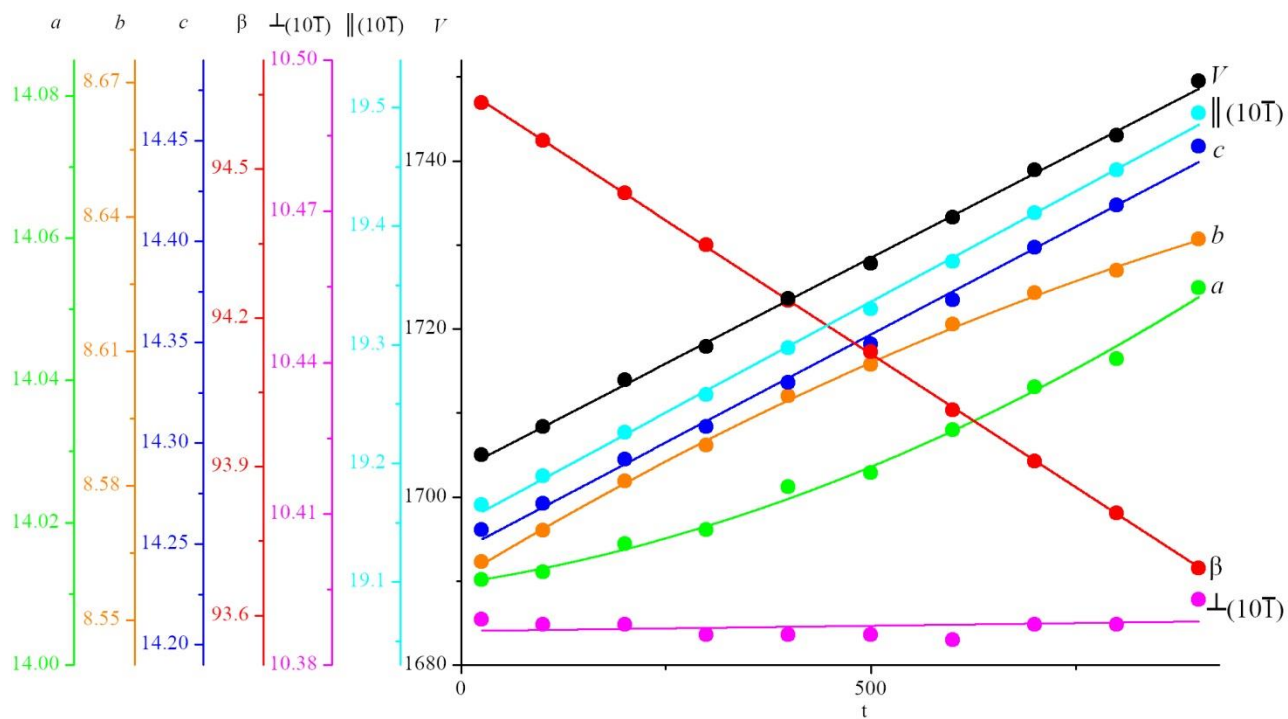

**Fig. S8** Temperature dependence of the unit cell parameters and distances along the normal ( $\perp$ ) and parallel ( $\parallel$ ) to  $(10\bar{1})$  plane for  $\text{Sr}_3\text{Nd}_2(\text{Ge}_3\text{O}_9)_2$ . Given for structure type after MPT.

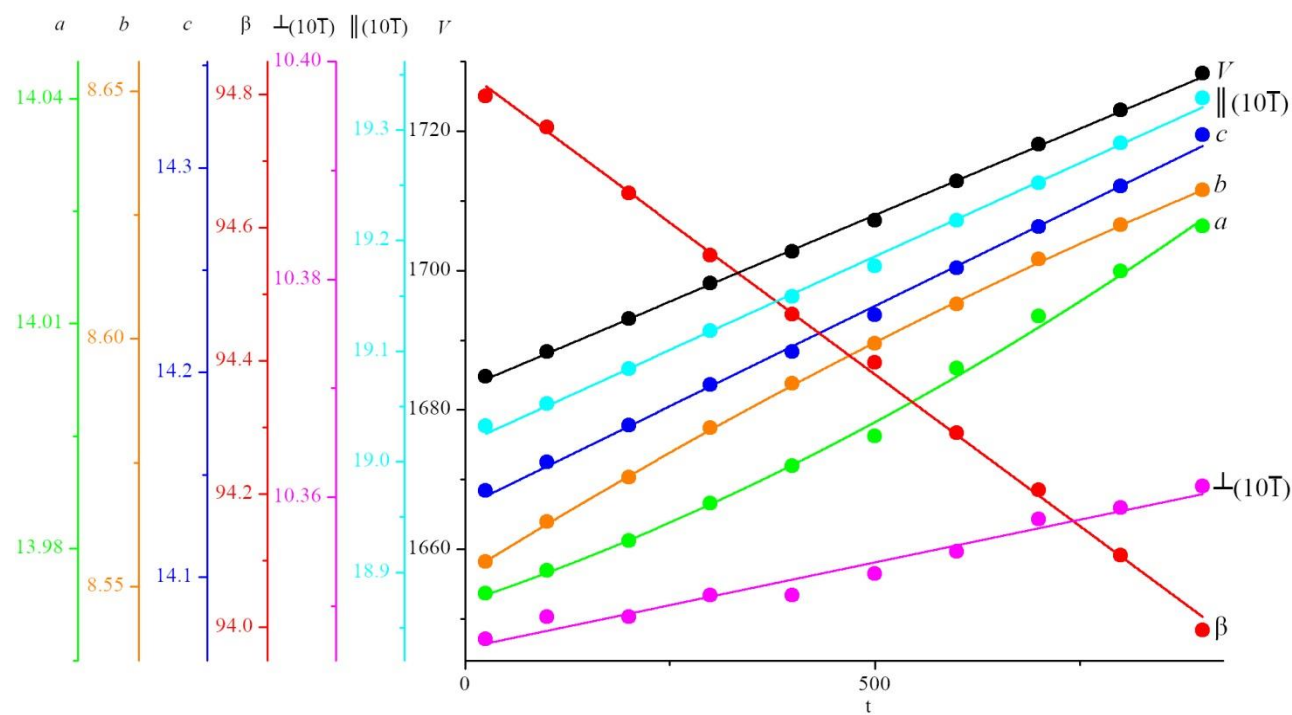

**Fig. S9** Temperature dependence of the unit cell parameters and distances along the normal ( $\perp$ ) and parallel ( $\parallel$ ) to  $(10\bar{1})$  plane for  $\text{Sr}_3\text{Sm}_2(\text{Ge}_3\text{O}_9)_2$ .

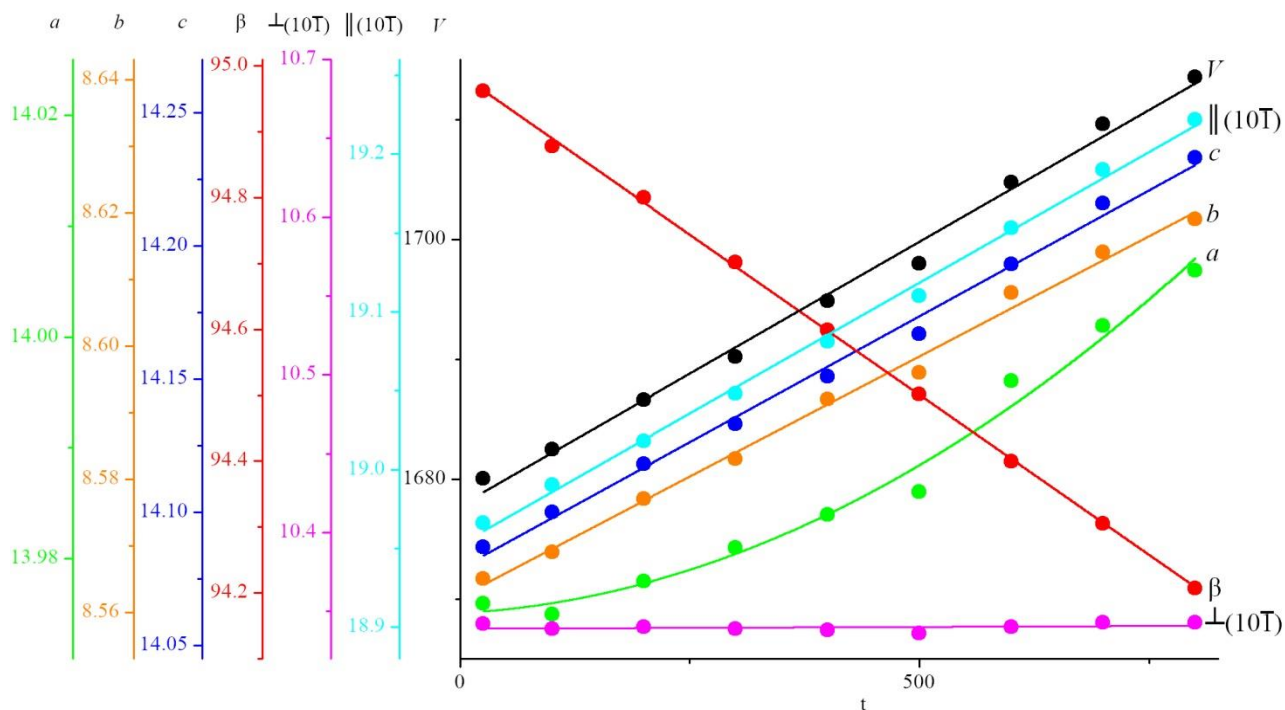

**Fig. S10** Temperature dependence of the unit cell parameters and distances along the normal ( $\perp$ ) and parallel ( $\parallel$ ) to  $(10\bar{1})$  plane for  $\text{Sr}_3\text{Eu}_2(\text{Ge}_3\text{O}_9)_2$ .

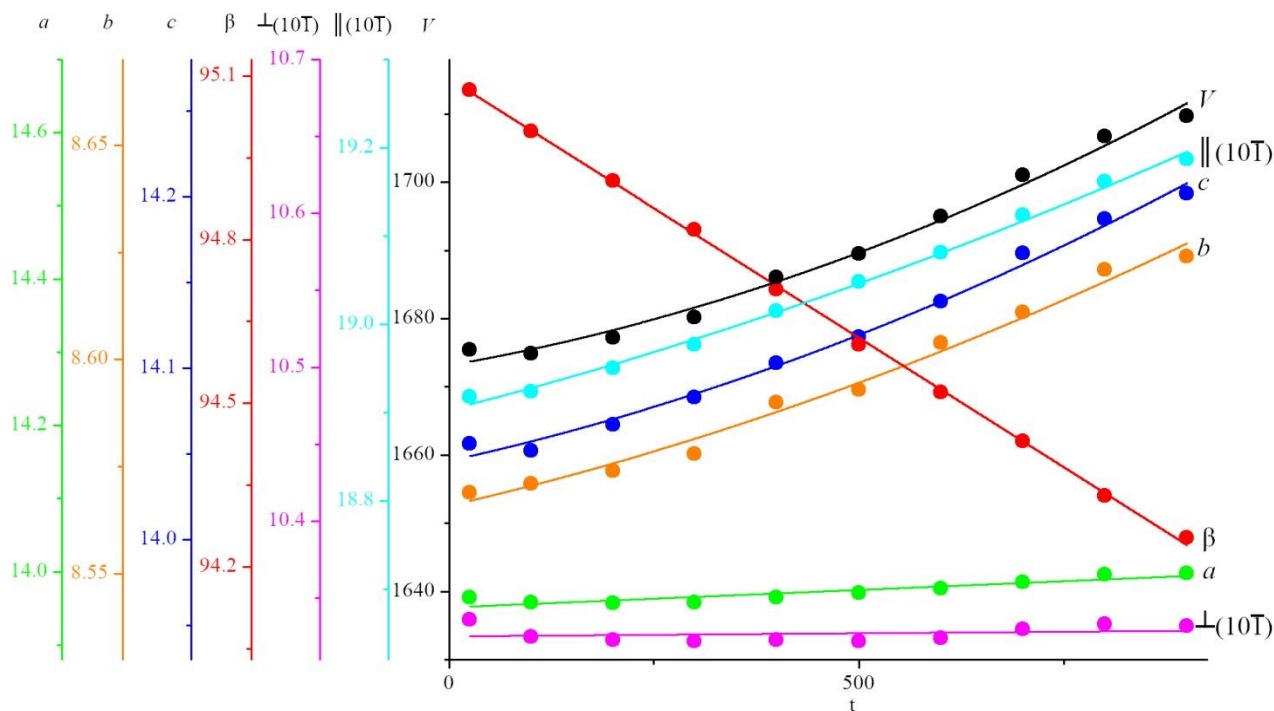

**Fig. S11** Temperature dependence of the unit cell parameters and distances along the normal ( $\perp$ ) and parallel ( $\parallel$ ) to  $(10\bar{1})$  plane for  $\text{Sr}_3\text{Gd}_2(\text{Ge}_3\text{O}_9)_2$ .

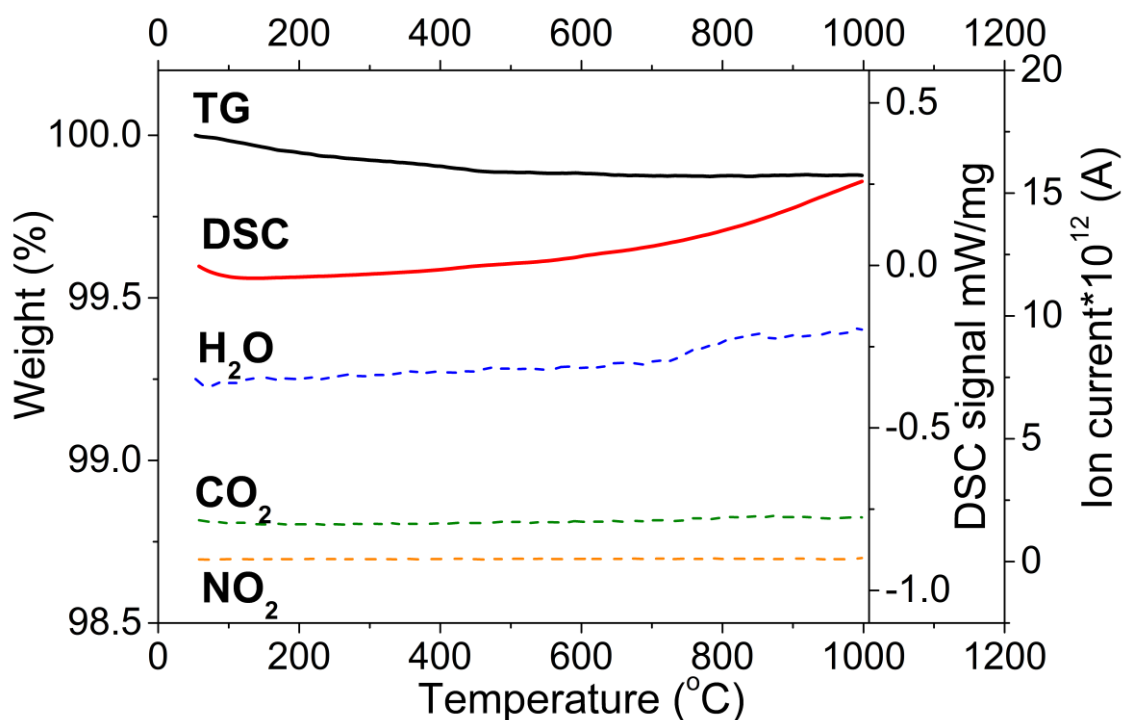

**Fig. S12** Simultaneous thermal analysis of the  $\text{Sr}_3\text{La}_2(\text{Ge}_3\text{O}_9)_2$ : solid lines - TG and DSC, dashed lines – ion currents of gases.

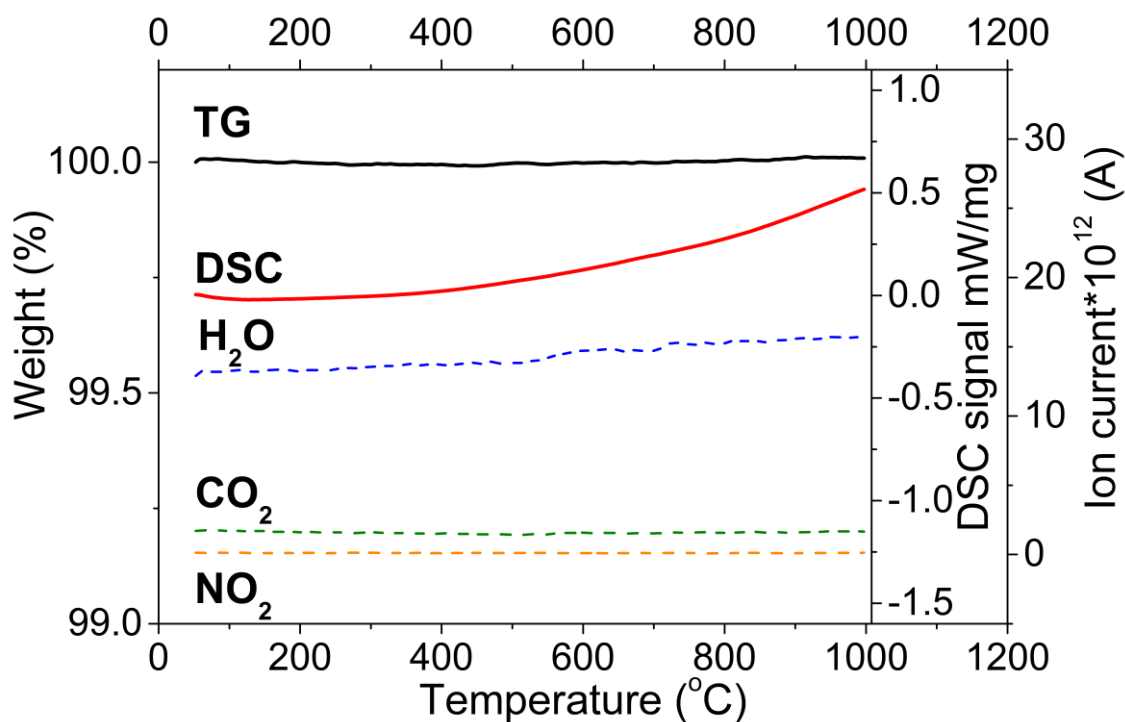

**Fig. S13** Simultaneous thermal analysis of the  $\text{Sr}_3\text{Gd}_2(\text{Ge}_3\text{O}_9)_2$ : solid lines - TG and DSC, dashed lines – ion currents of gases.

**Table S1** Selected bond lengths (Å), angles (°) for Sr<sub>3</sub>RE<sub>2</sub>(Ge<sub>3</sub>O<sub>9</sub>)<sub>2</sub> (RE = La, Pr, Sm, Eu, Gd) not included in Table 2

|                    | La           | Pr           | Sm           | Eu           | Gd           |
|--------------------|--------------|--------------|--------------|--------------|--------------|
| Ge(1)-O(1)         | 1.743(14)    | 1.826        | 1.750(15)    | 1.799(20)    | 1.846(16)    |
| Ge(1)-O(2)         | 1.752(14)    | 1.784(18)    | 1.788(18)    | 2.054(22)    | 1.934(20)    |
| Ge(1)-O(4)         | 1.809(11)    | 1.751(13)    | 1.709(14)    | 1.696(20)    | 1.714(17)    |
| Ge(1)-O(5)         | 1.794(11)    | 1.701(15)    | 1.783(17)    | 1.661(22)    | 1.703(20)    |
| <b>Average</b>     | <b>1.775</b> | <b>1.765</b> | <b>1.757</b> | <b>1.803</b> | <b>1.799</b> |
| <i>Expected</i>    | <i>1.75</i>  | <i>1.75</i>  | <i>1.75</i>  | <i>1.75</i>  | <i>1.75</i>  |
| Ge(2)-O(3)         | 1.774(11)    | 1.751(13)    | 1.774(12)    | 1.794(18)    | 1.766(15)    |
| Ge(2)-O(5)         | 1.816(11)    | 1.860(15)    | 1.774(18)    | 1.791(25)    | 1.781(21)    |
| Ge(2)-O(6)         | 1.736(10)    | 1.643(13)    | 1.686(12)    | 1.713(17)    | 1.695(15)    |
| Ge(2)-O(7)         | 1.758(12)    | 1.703(14)    | 1.771(17)    | 1.615(22)    | 1.702(19)    |
| <b>Average</b>     | <b>1.771</b> | <b>1.739</b> | <b>1.751</b> | <b>1.728</b> | <b>1.736</b> |
| <i>Expected</i>    | <i>1.75</i>  | <i>1.75</i>  | <i>1.75</i>  | <i>1.75</i>  | <i>1.75</i>  |
| Ge(3)-O(2)         | 1.811(14)    | 1.881(18)    | 1.775(19)    | 1.703(22)    | 1.706(20)    |
| Ge(3)-O(7)         | 1.778(12)    | 1.811(15)    | 1.764(16)    | 1.815(22)    | 1.758(20)    |
| Ge(3)-O(8)         | 1.703(12)    | 1.801(15)    | 1.728(13)    | 1.813(18)    | 1.768(15)    |
| Ge(3)-O(9)         | 1.779(12)    | 1.700(14)    | 1.717(16)    | 1.549(22)    | 1.621(19)    |
| <b>Average</b>     | <b>1.768</b> | <b>1.798</b> | <b>1.746</b> | <b>1.720</b> | <b>1.713</b> |
| <i>Expected</i>    | <i>1.75</i>  | <i>1.75</i>  | <i>1.75</i>  | <i>1.75</i>  | <i>1.75</i>  |
| Ge(1)-Ge(2)        | 3.232(4)     | 3.251(5)     | 3.124(6)     | 3.141(8)     | 3.130(6)     |
| Ge(1)-Ge(3)        | 3.2249(23)   | 3.2417(28)   | 3.088(4)     | 3.132(6)     | 3.089(5)     |
| Ge(2)-Ge(3)        | 3.223(4)     | 3.229(5)     | 3.150(6)     | 3.106(9)     | 3.153(8)     |
| <b>Average</b>     | <b>3.227</b> | <b>3.240</b> | <b>3.121</b> | <b>3.126</b> | <b>3.124</b> |
| <b>Bond angles</b> |              |              |              |              |              |
| O(1)-Ge(1)-O(2)    | 108.9(5)     | 106.2(7)     | 106.6(9)     | 104.3(10)    | 103.5(8)     |
| O(1)-Ge(1)-O(4)    | 119.0(6)     | 130.0(10)    | 118.7(7)     | 122.4(10)    | 117.1(9)     |
| O(1)-Ge(1)-O(5)    | 107.5(5)     | 109.6(6)     | 110.1(8)     | 116.1(10)    | 118.4(9)     |
| O(2)-Ge(1)-O(4)    | 104.0(5)     | 98.7(8)      | 105.8(7)     | 99.2(9)      | 102.9(8)     |
| O(2)-Ge(1)-O(5)    | 112.0(5)     | 113.2(6)     | 105.8(7)     | 101.0(9)     | 104.8(9)     |
| O(4)-Ge(1)-O(5)    | 105.4(5)     | 98.8(6)      | 108.9(8)     | 109.6(12)    | 108.1(10)    |
| <b>Average</b>     | <b>109.5</b> | <b>109.4</b> | <b>109.3</b> | <b>108.7</b> | <b>109.1</b> |
| O(3)-Ge(2)-O(5)    | 105.2(6)     | 99.9(7)      | 117.3(7)     | 119.6(10)    | 119.7(8)     |
| O(3)-Ge(2)-O(6)    | 120.6(5)     | 123.9(6)     | 120.3(6)     | 122.9(9)     | 121.1(8)     |
| O(3)-Ge(2)-O(7)    | 100.9(6)     | 105.5(8)     | 106.6(8)     | 107.0(11)    | 104.9(9)     |
| O(5)-Ge(2)-O(6)    | 109.3(6)     | 110.5(8)     | 101.3(8)     | 101.4(11)    | 104.6(9)     |
| O(5)-Ge(2)-O(7)    | 110.7(4)     | 106.6(5)     | 101.6(6)     | 94.7(9)      | 96.1(7)      |
| O(6)-Ge(2)-O(7)    | 109.8(6)     | 109.2(8)     | 108.1(8)     | 107.2(12)    | 107.0(11)    |
| <b>Average</b>     | <b>109.4</b> | <b>109.3</b> | <b>109.2</b> | <b>108.8</b> | <b>108.9</b> |
| O(2)-Ge(3)-O(7)    | 109.0(5)     | 108.7(6)     | 106.6(6)     | 111.6(11)    | 107.2(9)     |
| O(2)-Ge(3)-O(8)    | 101.1(6)     | 109.2(7)     | 112.2(7)     | 107.3(11)    | 109.5(10)    |
| O(2)-Ge(3)-O(9)    | 108.0(5)     | 103.1(7)     | 107.4(8)     | 107.7(11)    | 109.0(10)    |
| O(7)-Ge(3)-O(8)    | 100.5(5)     | 108.1(7)     | 105.2(8)     | 110.8(10)    | 112.1(8)     |
| O(7)-Ge(3)-O(9)    | 109.9(5)     | 108.8(7)     | 108.9(7)     | 104.6(11)    | 105.0(9)     |
| O(8)-Ge(3)-O(9)    | 127.3(7)     | 118.6(7)     | 116.1(8)     | 114.8(12)    | 113.8(10)    |
| <b>Average</b>     | <b>109.3</b> | <b>109.4</b> | <b>109.4</b> | <b>109.5</b> | <b>109.4</b> |
| Ge(1)-O(2)-Ge(3)   | 129.7(5)     | 124.3(6)     | 120.2(7)     | 112.7(10)    | 116.0(8)     |
| Ge(1)-O(5)-Ge(2)   | 127.0(6)     | 131.7(8)     | 122.8(9)     | 131.0(14)    | 127.9(12)    |
| Ge(2)-O(7)-Ge(3)   | 131.4(7)     | 133.5(8)     | 126.1(8)     | 129.7(13)    | 131.3(11)    |



**Table S2** Atom coordinates and thermal parameters ( $\text{\AA}^2$ ) for the  $\text{Sr}_3\text{RE}_2(\text{Ge}_3\text{O}_9)_2$  ( $\text{RE} = \text{La, Pr, Sm, Eu, Gd}$ ) compounds

| Atom          | La              | Pr                   | Sm                    | Eu                | Gd              |                 |
|---------------|-----------------|----------------------|-----------------------|-------------------|-----------------|-----------------|
| Sr/RE(1)      | <i>x/a</i>      | 0.16218(14)          | 0.16159(17)           | 0.16691(17)       | 0.16789(26)     | 0.16804(20)     |
|               | <i>y/b</i>      | 0.1174(5)            | 0.1232(10)            | 0.1237(4)         | 0.1278(6)       | 0.1269(5)       |
|               | <i>z/c</i>      | 0.41319(12)          | 0.41301(15)           | 0.40876(15)       | 0.40878(22)     | 0.40900(19)     |
|               | $U_i/U_e*100$   | 3.16(7)              | 3.22(7)               | 2.02(15)          | 3.55(27)        | 2.92(22)        |
|               | <i>Fraction</i> | 0.652(8)/0.348(8)    | 0.721(5)/0.279(5)     | 0.445(1)/0.555(1) | 0.459/0.541(12) | 0.442/0.558(9)  |
| Sr/RE(2)      | <i>x/a</i>      | 0.33451(13)          | 0.33582(17)           | 0.34232(20)       | 0.34282(30)     | 0.34262(25)     |
|               | <i>y/b</i>      | 0.1264(4)            | 0.1287(9)             | 0.1265(6)         | 0.1275(8)       | 0.1272(7)       |
|               | <i>z/c</i>      | 0.08156(11)          | 0.08226(13)           | 0.05086(18)       | 0.05242(26)     | 0.05419(23)     |
|               | $U_i/U_e*100$   | 2.59(7)              | 2.79(8)               | 2.34(16)          | 4.10(27)        | 3.54(22)        |
|               | <i>Fraction</i> | 0.665(7)/0.335(7)    | 0.657(6)/0.343(6)     | 1/0               | 0.983/0.017(5)  | 0.977/0.023(3)  |
| Sr/RE(3)      | <i>x/a</i>      | 0                    | 0                     | 0                 | 0.000000        | 0.000000        |
|               | <i>y/b</i>      | 0.3827(4)            | 0.3815(5)             | 0.3820(4)         | 0.3829(6)       | 0.3790(6)       |
|               | <i>z/c</i>      | 0.25                 | 0.25                  | 0.25              | 0.250000        | 0.250000        |
|               | $U_i/U_e*100$   | 2.85(7)              | 2.30(7)               | 0.92(16)          | 1.68(30)        | 1.85(24)        |
|               | <i>Fraction</i> | 0.365(1)/0.635(1)    | 0.245(2)/0.755(2)     | 0.109(1)/0.891(1) | 0.116/0.884(14) | 0.162/0.838(12) |
| Ge(1)         | <i>x/a</i>      | 0.09427(20)          | 0.09466(24)           | 0.08735(29)       | 0.0871(4)       | 0.08620(31)     |
|               | <i>y/b</i>      | 0.07120(31)          | 0.0726(4)             | 0.0476(4)         | 0.0478(6)       | 0.0441(5)       |
|               | <i>z/c</i>      | 0.10012(20)          | 0.10058(22)           | 0.12210(29)       | 0.12390(40)     | 0.12477(35)     |
|               | $U_i/U_e*100$   | 3.16(9)              | 3.32(12) <sup>a</sup> | 1.77(19)          | 2.75(31)        | 2.68(27)        |
|               | Ge(2)           | <i>x/a</i>           | 0.27338(17)           | 0.27218(20)       | 0.26283(24)     | 0.2622(4)       |
| <i>y/b</i>    |                 | 0.37129(54)          | 0.3696(8)             | 0.3650(9)         | 0.3572(11)      | 0.3611(10)      |
| <i>z/c</i>    |                 | 0.26763(14)          | 0.26511(16)           | 0.24393(23)       | 0.24436(35)     | 0.24203(30)     |
| $U_i/U_e*100$ |                 | 3.19(8)              | 3.28(10) <sup>a</sup> | 1.57(18)          | 3.32(31)        | 2.79(26)        |
| Ge(3)         |                 | <i>x/a</i>           | 0.40331(21)           | 0.40301(24)       | 0.40992(30)     | 0.4085(4)       |
|               | <i>y/b</i>      | 0.18030(32)          | 0.1772(4)             | 0.1871(4)         | 0.1824(7)       | 0.1840(5)       |
|               | <i>z/c</i>      | 0.40456(22)          | 0.40344(24)           | 0.38653(27)       | 0.38515(40)     | 0.38590(35)     |
|               | $U_i/U_e*100$   | 2.88(9)              | 3.10(13) <sup>a</sup> | 1.88(20)          | 4.39(34)        | 3.73(28)        |
|               | O(1)            | <i>x/a</i>           | -0.0033(9)            | -0.0059(12)       | -0.0016(11)     | -0.0095(15)     |
| <i>y/b</i>    |                 | 0.1785(15)           | 0.1839(21)            | 0.1889(19)        | 0.1855(26)      | 0.1861(22)      |
| <i>z/c</i>    |                 | 0.1363(8)            | 0.1435(9)             | 0.1326(12)        | 0.1299(14)      | 0.1230(12)      |
| O(2)          | <i>x/a</i>      | 0.0571(6)            | 0.0491(7)             | 0.0265(8)         | 0.0194(13)      | 0.0215(10)      |
|               | <i>y/b</i>      | 0.1195(19)           | 0.1179(24)            | 0.1339(24)        | 0.1601(28)      | 0.1524(25)      |
|               | <i>z/c</i>      | 0.5638(6)            | 0.5630(7)             | 0.5988(9)         | 0.5895(13)      | 0.5965(10)      |
| O(3)          | <i>x/a</i>      | 0.1549(8)            | 0.1570(9)             | 0.1610(9)         | 0.1598(14)      | 0.1603(12)      |
|               | <i>y/b</i>      | 0.3674(20)           | 0.3680(28)            | 0.3570(23)        | 0.3463(29)      | 0.3420(24)      |
|               | <i>z/c</i>      | 0.3026(6)            | 0.3047(8)             | 0.3105(9)         | 0.3125(13)      | 0.3092(11)      |
| O(4)          | <i>x/a</i>      | 0.1611(8)            | 0.1672(9)             | 0.1637(12)        | 0.1634(15)      | 0.1623(13)      |
|               | <i>y/b</i>      | 0.1520(18)           | 0.1193(31)            | 0.0683(17)        | 0.0536(24)      | 0.0590(23)      |
|               | <i>z/c</i>      | 0.0120(7)            | 0.0140(8)             | 0.0347(10)        | 0.0366(14)      | 0.0358(12)      |
| O(5)          | <i>x/a</i>      | 0.1767(8)            | 0.1799(10)            | 0.1563(14)        | 0.1475(19)      | 0.1542(17)      |
|               | <i>y/b</i>      | 0.0558(13)           | 0.0521(17)            | 0.0229(18)        | 0.0021(26)      | 0.0130(23)      |
|               | <i>z/c</i>      | 0.1875(7)            | 0.1782(9)             | 0.2329(12)        | 0.2269(16)      | 0.2299(14)      |
| O(6)          | <i>x/a</i>      | 0.2989(7)            | 0.2969(9)             | 0.2491(8)         | 0.2530(12)      | 0.2481(11)      |
|               | <i>y/b</i>      | 0.3617(18)           | 0.3774(28)            | 0.3669(23)        | 0.3631(34)      | 0.3550(28)      |
|               | <i>z/c</i>      | 0.1596(6)            | 0.1626(8)             | 0.1245(9)         | 0.1224(13)      | 0.1209(11)      |
| O(7)          | <i>x/a</i>      | 0.3193(8)            | 0.3267(12)            | 0.3358(13)        | 0.3308(17)      | 0.3352(15)      |
|               | <i>y/b</i>      | 0.1996(14)           | 0.2044(16)            | 0.2029(19)        | 0.2114(25)      | 0.2116(21)      |
|               | <i>z/c</i>      | 0.3200(8)            | 0.3100(9)             | 0.2798(10)        | 0.2765(15)      | 0.2794(13)      |
| O(8)          | <i>x/a</i>      | 0.3312(7)            | 0.3327(10)            | 0.3321(11)        | 0.3383(16)      | 0.3423(13)      |
|               | <i>y/b</i>      | 0.1322(23)           | 0.0952(23)            | 0.1585(21)        | 0.1526(31)      | 0.1548(28)      |
|               | <i>z/c</i>      | 0.4870(7)            | 0.4885(8)             | 0.4736(10)        | 0.4860(13)      | 0.4854(11)      |
| O(9)          | <i>x/a</i>      | 0.4969(9)            | 0.4984(11)            | 0.5070(12)        | 0.5263(15)      | 0.5218(13)      |
|               | <i>y/b</i>      | 0.0696(14)           | 0.0740(18)            | 0.0422(18)        | 0.0432(29)      | 0.0379(24)      |
|               | <i>z/c</i>      | 0.1312(7)            | 0.1261(9)             | 0.1254(11)        | 0.1373(16)      | 0.1357(13)      |
|               | $U_i/U_e*100^a$ | 2.19(9) <sup>a</sup> | 3.08(12) <sup>a</sup> | 1.53(19)          | 2.53(33)        | 2.15(29)        |

<sup>a</sup> The thermal vibration parameters of oxygen atoms have been constrained as a single variable.

**Table S3** Thermal expansion coefficients  $\text{Sr}_3\text{RE}_2(\text{Ge}_3\text{O}_9)_2$  ( $\text{RE} = \text{La, Pr, Nd, Sm, Eu, Gd}$ )

| $\alpha_L \times 10^6, \text{ }^\circ\text{C}^{-1}$ |                                                   |          |          |         |          |                                                   |          |          |         |          |                                                   |          |          |         |          |
|-----------------------------------------------------|---------------------------------------------------|----------|----------|---------|----------|---------------------------------------------------|----------|----------|---------|----------|---------------------------------------------------|----------|----------|---------|----------|
| T, $^\circ\text{C}$                                 | $\text{Sr}_3\text{La}_2(\text{Ge}_3\text{O}_9)_2$ |          |          |         |          | $\text{Sr}_3\text{Pr}_2(\text{Ge}_3\text{O}_9)_2$ |          |          |         |          | $\text{Sr}_3\text{Nd}_2(\text{Ge}_3\text{O}_9)_2$ |          |          |         |          |
|                                                     | <i>a</i>                                          | <i>b</i> | <i>c</i> | $\beta$ | <i>V</i> | <i>a</i>                                          | <i>b</i> | <i>c</i> | $\beta$ | <i>V</i> | <i>a</i>                                          | <i>b</i> | <i>c</i> | $\beta$ | <i>V</i> |
| 100                                                 | 6.7                                               | 11.3     | 1.0      | -0.9    | 19.0     | 4.5                                               | 10.9     | -0.1     | -0.9    | 15.4     | 1.3                                               | 10.7     | 12.6     | -10.7   | 26.1     |
| 200                                                 | 4.7                                               | 11.1     | -2.8     | -1.0    | 13.0     | 3.9                                               | 11.4     | -2.1     | -1.9    | 13.3     | 3.1                                               | 12.7     | 15.1     | -11.1   | 32.3     |
| 300                                                 | 2.3                                               | 9.5      | -4.0     | -1.7    | 7.7      | 5.6                                               | 13.9     | -1.1     | -2.3    | 18.4     | 1.1                                               | 9.2      | 11.6     | -11.1   | 23.3     |
| 400                                                 | 5.4                                               | 13.2     | -1.2     | -2.3    | 17.3     | 5.0                                               | 12.1     | -0.5     | -3.6    | 16.7     | 4.0                                               | 12.6     | 15.1     | -12.0   | 33.1     |
| 500                                                 | 6.1                                               | 14.7     | -1.3     | -2.9    | 19.5     | 4.5                                               | 12.6     | -2.5     | -2.3    | 14.7     | 2.1                                               | 7.8      | 13.2     | -10.9   | 24.4     |
| 600                                                 | 6.6                                               | 13.2     | 0.3      | -3.3    | 20.2     | 6.4                                               | 13.8     | 2.2      | -3.2    | 22.4     | 4.1                                               | 10.8     | 15.0     | -12.4   | 31.3     |
| 700                                                 | 5.4                                               | 13.5     | 1.7      | -4.0    | 20.7     | 6.3                                               | 8.6      | 4.3      | -4.8    | 19.3     | 4.5                                               | 8.6      | 18.3     | -11.0   | 32.6     |
| 800                                                 | 17.6                                              | 26.4     | 9.8      | -3.9    | 53.7     | 3.0                                               | 14.3     | -3.3     | -3.3    | 14.1     | 2.3                                               | 5.6      | 14.4     | -11.2   | 23.6     |
| 900                                                 | 5.2                                               | 15.8     | -3.1     | -1.9    | 18.0     | 4.5                                               | 17.7     | -4.5     | -3.3    | 17.8     | 7.1                                               | 8.1      | 20.5     | -11.8   | 36.9     |
| T, $^\circ\text{C}$                                 | $\text{Sr}_3\text{Sm}_2(\text{Ge}_3\text{O}_9)_2$ |          |          |         |          | $\text{Sr}_3\text{Eu}_2(\text{Ge}_3\text{O}_9)_2$ |          |          |         |          | $\text{Sr}_3\text{Gd}_2(\text{Ge}_3\text{O}_9)_2$ |          |          |         |          |
|                                                     | <i>a</i>                                          | <i>b</i> | <i>c</i> | $\beta$ | <i>V</i> | <i>a</i>                                          | <i>b</i> | <i>c</i> | $\beta$ | <i>V</i> | <i>a</i>                                          | <i>b</i> | <i>c</i> | $\beta$ | <i>V</i> |
| 100                                                 | 3.4                                               | 11.2     | 12.7     | -6.7    | 14.2     | -1.0                                              | 6.5      | 12.3     | -11.9   | 19.6     | -6.4                                              | 3.6      | -3.5     | -10.7   | -4.8     |
| 200                                                 | 2.4                                               | 11.3     | 12.8     | -10.4   | 17.0     | 2.1                                               | 8.4      | 12.7     | -8.2    | 24.4     | -0.7                                              | 3.0      | 10.4     | -9.5    | 14.1     |
| 300                                                 | 3.8                                               | 10.7     | 14.1     | -9.8    | 17.7     | 1.8                                               | 7.3      | 10.8     | -10.3   | 21.3     | 0.2                                               | 4.8      | 11.5     | -9.5    | 17.8     |
| 400                                                 | 3.8                                               | 10.5     | 11.3     | -9.4    | 16.0     | 2.4                                               | 10.5     | 13.1     | -10.9   | 27.5     | 5.4                                               | 13.5     | 14.0     | -11.5   | 34.5     |
| 500                                                 | 3.0                                               | 9.5      | 12.8     | -7.6    | 14.8     | 1.2                                               | 4.8      | 10.9     | -10.3   | 18.3     | 4.4                                               | 4.1      | 10.4     | -10.8   | 20.4     |
| 600                                                 | 6.1                                               | 9.4      | 16.0     | -11.3   | 21.2     | 6.8                                               | 13.4     | 18.0     | -10.8   | 39.6     | 3.8                                               | 12.8     | 14.7     | -9.2    | 32.5     |
| 700                                                 | 4.9                                               | 10.9     | 13.9     | -9.1    | 17.5     | 3.8                                               | 7.1      | 16.5     | -10.1   | 28.7     | 6.6                                               | 7.8      | 20.3     | -9.5    | 35.9     |
| 800                                                 | 4.7                                               | 7.9      | 14.3     | -10.4   | 18.8     | 3.5                                               | 6.0      | 11.8     | -10.4   | 22.6     | 7.2                                               | 11.3     | 13.6     | -10.6   | 33.4     |
| 900                                                 | 3.9                                               | 8.2      | 17.0     | -12.0   | 21.2     |                                                   |          |          |         |          | 1.8                                               | 4.2      | 10.5     | -8.2    | 17.5     |
